# Supplementary material for: The Role of Cymodocea nodosa and Caulerpa prolifera Meadows as Nitrogen Sinks in Temperate Coastal Lagoons
Source: MDPI journal article supplement (doi:10.3390/d15020172), 2023-01-26
Supplement: s1 [file s1]

**Table S1.** Position and depth of sampling stations for *C. nodosa* and *C. prolifera* in the Mar Menor.

| Station | Site              | Species             | Position (UTM, 30S) |         | Depth (m) |
|---------|-------------------|---------------------|---------------------|---------|-----------|
|         |                   |                     | x                   | y       |           |
| 1       | Lo Pagán          | <i>C. nodosa</i>    | 693776              | 4186340 | 0.8       |
| 2       | Encañizadas       | <i>C. nodosa</i>    | 697196              | 4183880 | 1.2       |
| 3       | La Manga          | <i>C. nodosa</i>    | 699707              | 4172585 | 0.9       |
| 4       | Perdiguera Island | <i>C. nodosa</i>    | 693976              | 4174698 | 1         |
| 5       | Albujón Wadi      | <i>C. nodosa</i>    | 688782              | 4176517 | 0.7       |
| 6       | El Beal Wadi      | <i>C. nodosa</i>    | 692957              | 4171054 | 0.8       |
| 7       | Playa Honda       | <i>C. nodosa</i>    | 698440              | 4168098 | 0.9       |
| 8       | Encañizadas       | <i>C. prolifera</i> | 696432              | 4184203 | 2,7       |
| 9       | La Hita Beach     | <i>C. prolifera</i> | 693204              | 4182230 | 2.9       |
| 10      | Albujón Wadi      | <i>C. prolifera</i> | 689212              | 4176654 | 2,7       |
| 11      | Carrasquilla Wadi | <i>C. prolifera</i> | 696918              | 4169591 | 3.2       |

**Table S2.** Summary for the GLM fitted to Vmax data in relation to N source, species and site. Tukey tests were applied to the fitted GLM to compare Vmax values between different factor levels. The asterisk (\*) indicates that the p value was significant.

| Vmax GLM model summary   |          |            |         |            |
|--------------------------|----------|------------|---------|------------|
|                          | Estimate | Std. Error | t value | p value    |
| Nsource                  | 0.035    | 0.006      | 5.622   | <0.001 *** |
| Species                  | 0.005    | 0.002      | 3.049   | 0.005 **   |
| Site                     | 0.008    | 0.002      | 3.446   | 0.002 **   |
| Nsource X Species        | 0.472    | 0.118      | 4.001   | <0.001 *** |
| Nsource X Site           | 0.112    | 0.037      | 3.034   | 0.005 **   |
| Species X Site           | 0.003    | 0.004      | 0.784   | 0.440      |
| Nsource X Species X Site | 0.797    | 0.351      | 2.275   | 0.031 *    |

*Multiple Comparisons of Means: Tukey Contrasts*

|                                | Estimate | Std. Error | z value | p value    |
|--------------------------------|----------|------------|---------|------------|
| NitxCauxALBHN VS AmmxCauxALBHN | 0.035    | 0.006      | 5.622   | <0.001 *** |
| AmmxCymxALBHN VS AmmxCauxALBHN | 0.005    | 0.002      | 3.049   | 0.026 *    |
| NitxCymxALBHN VS AmmxCauxALBHN | 0.512    | 0.118      | 4.347   | <0.001 *** |
| AmmxCauxENCLN VS AmmxCauxALBHN | 0.008    | 0.002      | 3.446   | 0.002 **   |

|                                |        |       |        |        |     |
|--------------------------------|--------|-------|--------|--------|-----|
| NitxCauxENCLN VS AmmxCauxALBHN | 0.155  | 0.036 | 4.281  | <0.001 | *** |
| AmmxCymxENCLN VS AmmxCauxALBHN | 0.016  | 0.003 | 5.022  | <0.001 | *** |
| NitxCymxALBLN VS AmmxCauxALBHN | 1.432  | 0.328 | 4.365  | <0.001 | *** |
| AmmxCymxALBHN VS NitxCauxALBHN | -0.031 | 0.006 | -4.773 | <0.001 | *** |
| NitxCymxALBHN VS NitxCauxALBHN | 0.476  | 0.118 | 4.041  | <0.001 | *** |
| AmmxCauxENCLN VS NitxCauxALBHN | -0.027 | 0.007 | -4.102 | <0.001 | *** |
| NitxCauxENCLN VS NitxCauxALBHN | 0.120  | 0.037 | 3.258  | 0.013  | *   |
| AmmxCymxENCLN VS NitxCauxALBHN | -0.019 | 0.007 | -2.768 | 0.059  | .   |
| NitxCymxENCLN VS NitxCauxALBHN | 1.397  | 0.328 | 4.257  | <0.001 | *** |
| NitxcymxALBHN VS AmmxCymxALBHN | 0.507  | 0.118 | 4.307  | <0.001 | *** |
| AmmxCauxENCLN VS AmmxCymxALBHN | 0.003  | 0.003 | 1.251  | 0.860  |     |
| NitxCauxENCLN VS AmmxCymxALBHN | 0.150  | 0.036 | 4.149  | <0.001 | *** |
| AmmxCymxENCLN VS AmmxCymxALBHN | 0.011  | 0.003 | 3.278  | 0.012  | *   |
| NitxCymxENCLN VS AmmxCymxALBHN | 1.427  | 0.328 | 4.351  | <0.001 | *** |
| AmmxCauxENCLN VS NitxCymxALBHN | -0.504 | 0.118 | -4.278 | <0.001 | *** |
| NitxCauxENCLN VS NitxCymxALBHN | -0.357 | 0.123 | -2.895 | 0.041  | *   |
| AmmxCymxENCLN VS NitxCymxENCLN | -0.496 | 0.118 | -4.210 | <0.001 | *** |
| NitxCymxENCLN VS NitxCymxALBHN | 0.920  | 0.349 | 2.640  | 0.083  | .   |
| NitxCauxENCLN VS AmmxCauxENCLN | 0.147  | 0.036 | 4.052  | <0.001 | *** |
| AmmxCymxENCLN VS AmmxCauxENCLN | 0.008  | 0.004 | 2.054  | 0.322  |     |
| NitxCymxENCLN VS AmmxCauxENCLN | 1.424  | 0.328 | 4.341  | <0.001 | *** |
| AmmxCymxENCLN VS NitxCauxENCLN | -0.139 | 0.036 | -3.827 | 0.002  | **  |
| NitxCymxENCLN VS NitxCauxENCLN | 1.277  | 0.330 | 3.869  | 0.002  | **  |
| NitxCymxENCLN VS AmmxCymxENCLN | 1.416  | 0.328 | 4.316  | <0.001 | *** |

**Table S3.** Summary for the GLM fitted to Km data in relation to N Source, species and site. Tukey tests were applied to the fitted GLM to compare Km values between different factor levels. The asterisk (\*) indicates that the p value was significant.

| <b>Km GLM model summary</b> |          |            |         |         |     |
|-----------------------------|----------|------------|---------|---------|-----|
|                             | Estimate | Std. Error | t value | p value |     |
| Nsource                     | 0.029    | 0.006      | 4.528   | <0.001  | *** |
| Species                     | 0.004    | 0.001      | 2.516   | 0.018   | *   |
| Site                        | 0.004    | 0.002      | 2.230   | 0.034   | *   |
| Nsource X Species           | 0.006    | 0.014      | 0.462   | 0.647   |     |
| Nsource X Site              | -0.013   | 0.009      | -1.423  | 0.166   |     |
| Species X Site              | -0.002   | 0.003      | -0.731  | 0.471   |     |
| Nsource X Species X Site    | 0.036    | 0.025      | 1.482   | 0.150   |     |

**Table S4.** Summary for the GLM fitted to  $\alpha$  data in relation to N Source, species and site. Tukey tests were applied to the fitted GLM to compare  $\alpha$  values between different factor levels. The asterisk (\*) indicates that the p value was significant.

| <b><math>\alpha</math> GLM model summary</b> |          |            |         |            |
|----------------------------------------------|----------|------------|---------|------------|
|                                              | Estimate | Std. Error | t value | p value    |
| Nsource                                      | -0.125   | 0.100      | -1.25   | 0.221      |
| Species                                      | -0.052   | 0.107      | -0.49   | 0.630      |
| Site                                         | 0.272    | 0.132      | 2.06    | 0.049 *    |
| Nsource X Species                            | 11.138   | 0.983      | 11.33   | <0.001 *** |
| Nsource X Site                               | 5.175    | 0.548      | 9.45    | <0.001 *** |
| Species X Site                               | 0.916    | 0.206      | 4.45    | <0.001 *** |
| Nsource X Species X Site                     | 1.633    | 1.967      | 0.83    | 0.414      |

  

| <i>Multiple Comparisons of Means: Tukey Contrasts</i> |          |            |         |            |
|-------------------------------------------------------|----------|------------|---------|------------|
| <i>Nsource X Species</i>                              |          |            |         |            |
|                                                       | Estimate | Std. Error | t value | p value    |
| NitxCau VS AmmxCau                                    | 0.025    | 0.005      | 5.309   | <0.001 *** |
| AmmxCym VS AmmxCau                                    | 0.004    | 0.001      | 3.193   | 0.005 **   |
| NitxCym VS AmmxCau                                    | 0.048    | 0.010      | 4.622   | <0.001 *** |
| AmmxCym VS NitxCau                                    | -0.021   | 0.005      | -4.423  | <0.001 *** |
| NitxCym VS NitXCau                                    | 0.024    | 0.011      | 2.073   | 0.130      |
| NitxCym VS AmmxCym                                    | 0.045    | 0.010      | 4.250   | <0.001 *** |
| <i>Nsource X Site</i>                                 |          |            |         |            |
|                                                       | Estimate | Std. Error | t value | p value    |
| NitxALBHN VS AmmxALBHN                                | 0.031    | 0.007      | 4.258   | <0.001 *** |
| AmmxENCLN VS AmmxALBHN                                | 0.004    | 0.002      | 2.302   | 0.078 .    |
| NitxENCLN VS AmmxALBHN                                | 0.030    | 0.009      | 3.466   | 0.002 **   |
| AmmxENCLN VS NitxALBHN                                | -0.028   | 0.007      | -3.721  | <0.001 *** |
| NitxENCLN VS NitxALBHN                                | -0.001   | 0.011      | -0.110  | 0.999      |
| NitxENCLN VS AmmxENCLN                                | 0.026    | 0.009      | 3.025   | 0.01029 *  |
| <i>Species X Site</i>                                 |          |            |         |            |
|                                                       | Estimate | Std. Error | t value | p value    |
| CymxALBHN VS CauxALBHN                                | 0.004    | 0.003      | 1.300   | 0.550      |
| CauxENCLN VS CauxALBHN                                | 0.004    | 0.004      | 1.173   | 0.632      |
| CymxENCLN VS CauxALBHN                                | 0.006    | 0.004      | 1.662   | 0.332      |
| CAauxENCLN VS Cym ALBHN                               | 0.000    | 0.005      | -0.073  | 1.000      |
| CymxENCLN VS CymxALBHN                                | 0.002    | 0.005      | 0.405   | 0.976      |
| CymxENCLN VS CauENCLN                                 | 0.002    | 0.005      | 0.468   | 0.964      |

**Table S5.** Summary for the GLM fitted to Vamb data in relation to N Source, species and site. Tukey tests were applied to the fitted GLM to compare Vamb values between different factor levels. The asterisk (\*) indicates that the p value was significant.

| <b>Vamb GLM model summary</b> |          |            |         |            |
|-------------------------------|----------|------------|---------|------------|
|                               | Estimate | Std. Error | t value | p value    |
| Nsource                       | 0.35     | 0.08       | 4.32    | <0.001 *** |
| Species                       | -0.08    | 0.10       | -0.78   | 0.439      |
| Site                          | -1.03    | 0.13       | -7.67   | <0.001 *** |
| Nsource X Species             | -2.29    | 0.18       | -12.92  | <0.001 *** |
| Nsource X Site                | -1.31    | 0.20       | -6.66   | <0.001 *** |
| Species X Site                | -0.20    | 0.20       | -0.98   | 0.330      |
| Nsource X Species X Site      | 1.32     | 0.38       | 3.44    | <0.001 *** |

*Multiple Comparisons of Means: Tukey Contrasts*

|                                | Estimate | Std. Error | z value | p value    |
|--------------------------------|----------|------------|---------|------------|
| NitxCauxALBHN VS AmmxCauxALBHN | 0.351    | 0.081      | 4.319   | <0.001 *** |
| AmmxCymxALBHN VS AmmxCauxALBHN | -0.077   | 0.099      | -0.775  | 0.993      |
| NitxCymxALBHN VS AmmxCauxALBHN | -2.013   | 0.156      | -12.893 | <0.001 *** |
| AmmxCauxENCLN VS AmmxCauxALBHN | -1.026   | 0.134      | -7.667  | <0.001 *** |
| NitxCauxENCLN VS AmmxCauxALBHN | -1.989   | 0.155      | -12.862 | <0.001 *** |
| AmmxCymxENCLN VS AmmxCauxALBHN | -1.299   | 0.148      | -8.748  | <0.001 *** |
| NitxCymxALBLN VS AmmxCauxALBHN | -3.229   | 0.266      | -12.116 | <0.001 *** |
| AmmxCymxALBHN VS NitxCauxALBHN | -0.428   | 0.084      | -5.120  | <0.001 *** |
| NitxCymxALBHN VS NitxCauxALBHN | -2.364   | 0.147      | -16.110 | <0.001 *** |
| AmmxCauxENCLN VS NitxCauxALBHN | -1.377   | 0.123      | -11.219 | <0.001 *** |
| NitxCauxENCLN VS NitxCauxALBHN | -2.340   | 0.145      | -16.122 | <0.001 *** |
| AmmxCymxENCLN VS NitxCauxALBHN | -1.650   | 0.139      | -11.907 | <0.001 *** |
| NitxCymxENCLN VS NitxCauxALBHN | -3.580   | 0.261      | -13.711 | <0.001 *** |
| NitxcymxALBHN VS AmmxCymxALBHN | -1.936   | 0.157      | -12.306 | <0.001 *** |
| AmmxCauxENCLN VS AmmxCymxALBHN | -0.949   | 0.135      | -7.019  | <0.001 *** |
| NitxCauxENCLN VS AmmxCymxALBHN | -1.912   | 0.156      | -12.269 | <0.001 *** |
| AmmxCymxENCLN VS AmmxCymxALBHN | -1.222   | 0.150      | -8.161  | <0.001 *** |
| NitxCymxENCLN VS AmmxCymxALBHN | -3.152   | 0.267      | -11.797 | <0.001 *** |
| AmmxCauxENCLN VS NitxCymxALBHN | 0.987    | 0.181      | 5.448   | <0.001 *** |
| NitxCauxENCLN VS NitxCymxALBHN | 0.025    | 0.197      | 0.125   | 1.000      |
| AmmxCymxENCLN VS NitxCymxENCLN | 0.715    | 0.192      | 3.716   | 0.00 **    |
| NitxCymxENCLN VS NitxCymxALBHN | -1.216   | 0.293      | -4.146  | <0.001 *** |
| NitxCauxENCLN VS AmmxCauxENCLN | -0.963   | 0.180      | -5.351  | <0.001 *** |
| AmmxCymxENCLN VS AmmxCauxENCLN | -0.273   | 0.175      | -1.562  | 0.743      |
| NitxCymxENCLN VS AmmxCauxENCLN | -2.203   | 0.282      | -7.814  | <0.001 *** |
| AmmxCymxENCLN VS NitxCauxENCLN | 0.690    | 0.191      | 3.611   | 0.006 **   |

|                                |        |       |        |        |     |
|--------------------------------|--------|-------|--------|--------|-----|
| NitxCymxENCLN VS NitxCauxENCLN | -1.240 | 0.292 | -4.242 | <0.001 | *** |
| NitxCymxENCLN VS AmmxCymxENCLN | -1.930 | 0.289 | -6.675 | <0.001 | *** |

**Table S6.** Biomass of *C. nodosa* and *C. prolifera* aboveground and belowground tissues determined at different sites in the Mar Menor lagoon. Values are means (n = 3) with SEs.

| Station | Locality          | Species             | Biomass (gDWm <sup>-2</sup> ) |                |                 |
|---------|-------------------|---------------------|-------------------------------|----------------|-----------------|
|         |                   |                     | Aboveground                   | Belowground    | Total           |
| 1       | Lo Pagán          | <i>C. nodosa</i>    | 299.26 ± 6.89                 | 654.78 ± 21.45 | 954.05 ± 46.12  |
| 2       | Encañizadas       | <i>C. nodosa</i>    | 269.38 ± 6.07                 | 406.81 ± 64.17 | 676.18 ± 40.48  |
| 3       | La Manga          | <i>C. nodosa</i>    | 213.15 ± 18.16                | 838.87 ± 22.74 | 1052.02 ± 75.89 |
| 4       | Perdiguera Island | <i>C. nodosa</i>    | 201.68 ± 15.95                | 873.51 ± 30.58 | 1075.19 ± 54.25 |
| 5       | Albujón Wadi      | <i>C. nodosa</i>    | 327.48 ± 10.3                 | 689.76 ± 32.59 | 1017.24 ± 51.45 |
| 6       | El Beal Wadi      | <i>C. nodosa</i>    | 312.16 ± 14.88                | 292.8 ± 15.1   | 604.96 ± 59.96  |
| 7       | Playa Honda       | <i>C. nodosa</i>    | 348.07 ± 19.91                | 904.03 ± 21.88 | 1252.1 ± 83.58  |
| 8       | Encañizadas       | <i>C. prolifera</i> | -                             | -              | 197.42 ± 17.28  |
| 9       | La Hita Beach     | <i>C. prolifera</i> | -                             | -              | 183.17 ± 12.42  |
| 10      | Albujón Wadi      | <i>C. prolifera</i> | -                             | -              | 508.75 ± 34.54  |
| 11      | Carrasquilla Wadi | <i>C. prolifera</i> | -                             | -              | 276.06 ± 8.7    |

**Table S7.** Nitrogen content % and C/Nratio of *C. nodosa* and *C. prolifera* aboveground and belowground tissues determined at different sites in the Mar Menor lagoon. Values are means (n = 3) with SEs.

| Station | Locality          | Species             | Nitrogen content (% DW) |             | C/N ratio    |              |
|---------|-------------------|---------------------|-------------------------|-------------|--------------|--------------|
|         |                   |                     | Aboveground             | Belowground | Aboveground  | Belowground  |
| 1       | Lo Pagán          | <i>C. nodosa</i>    | 3.76 ± 0.34             | 2.16 ± 0.06 | 12.56 ± 0.66 | 20.81 ± 0.5  |
| 2       | Encañizadas       | <i>C. nodosa</i>    | 3.03 ± 0.13             | 0.98 ± 0.07 | 14.61 ± 0.06 | 42.8 ± 2.85  |
| 3       | La Manga          | <i>C. nodosa</i>    | 3.09 ± 0.18             | 2.18 ± 0.05 | 14.96 ± 0.6  | 19.43 ± 0.25 |
| 4       | Perdiguera Island | <i>C. nodosa</i>    | 3.07 ± 0.16             | 2.73 ± 0.08 | 15.14 ± 0.16 | 15.75 ± 0.37 |
| 5       | Albujón Wadi      | <i>C. nodosa</i>    | 3.96 ± 0.05             | 2.2 ± 0.03  | 14.14 ± 0.13 | 27.91 ± 0.64 |
| 6       | El Beal Wadi      | <i>C. nodosa</i>    | 3.89 ± 0.11             | 1.71 ± 0.05 | 12.22 ± 0.05 | 23.69 ± 0.53 |
| 7       | Playa Honda       | <i>C. nodosa</i>    | 3.88 ± 0.07             | 1.93 ± 0.05 | 12.99 ± 0.1  | 22.29 ± 0.18 |
| 8       | Encañizadas       | <i>C. prolifera</i> | 3 ± 0.06                | -           | 13.55 ± 0.05 | -            |
| 9       | La Hita Beach     | <i>C. prolifera</i> | 3.71 ± 0.07             | -           | 13.71 ± 0.05 | -            |
| 10      | Albujón Wadi      | <i>C. prolifera</i> | 3.93 ± 0.1              | -           | 13.18 ± 0.15 | -            |
| 11      | Carrasquilla Wadi | <i>C. prolifera</i> | 4.48 ± 0.15             | -           | 11.14 ± 0.05 | -            |

**Table S8.** Meadow Nitrogen Stock (gNm<sup>-2</sup>) of *C. nodosa* and *C. prolifera* aboveground and belowground tissues determined at different sites in the Mar Menor lagoon. Values are means (n = 3) with SEs.

| Station | Locality          | Species             | Meadow Nitrogen Stock (gNm <sup>-2</sup> ) |              |              |
|---------|-------------------|---------------------|--------------------------------------------|--------------|--------------|
|         |                   |                     | Aboveground                                | Belowground  | Total        |
| 1       | Lo Pagán          | <i>C. nodosa</i>    | 11.26 ± 0.26                               | 13.78 ± 0.92 | 25.04 ± 1.18 |
| 2       | Encañizadas       | <i>C. nodosa</i>    | 8.16 ± 0.18                                | 4.01 ± 1.27  | 12.17 ± 1.45 |
| 3       | La Manga          | <i>C. nodosa</i>    | 6.58 ± 0.56                                | 19.8 ± 1.11  | 26.38 ± 1.67 |
| 4       | Perdiguera Island | <i>C. nodosa</i>    | 6.2 ± 0.49                                 | 23.09 ± 1.61 | 29.29 ± 2.1  |
| 5       | Albujón Wadi      | <i>C. nodosa</i>    | 12.97 ± 0.41                               | 16.07 ± 0.76 | 29.05 ± 1.17 |
| 6       | El Beal Wadi      | <i>C. nodosa</i>    | 12.13 ± 0.58                               | 6.68 ± 0.68  | 18.81 ± 1.25 |
| 7       | Playa Honda       | <i>C. nodosa</i>    | 13.51 ± 0.77                               | 16.02 ± 0.76 | 29.52 ± 1.53 |
| 8       | Encañizadas       | <i>C. prolifera</i> | -                                          | -            | 5.93 ± 0.52  |
| 9       | La Hita Beach     | <i>C. prolifera</i> | -                                          | -            | 6.79 ± 0.46  |
| 10      | Albujón Wadi      | <i>C. prolifera</i> | -                                          | -            | 20 ± 1.36    |
| 11      | Carrasquilla Wadi | <i>C. prolifera</i> | -                                          | -            | 12.37 ± 0.39 |
